# Supplementary material
Source: PubMed Central journal article supplement (PMC4070867)
Supplement: supp_112.106195_biolreprod.112.106195-2.pdf [file supp_112.106195_biolreprod.112.106195-2.pdf]

**Table S1. Characteristics of participants (Kinshasa, Democratic Republic of the Congo [-/+ malaria]).**

| <b>Characteristic</b>               | <b>Control (-malaria)</b> | <b>Infected (+malaria)</b> | <b>P-value<sup>1</sup></b> |
|-------------------------------------|---------------------------|----------------------------|----------------------------|
|                                     | <b>n=17</b>               | <b>n=17</b>                |                            |
|                                     | <b>Mean (SD)</b>          |                            |                            |
| Maternal age (years)                | 28.2 (6.2)                | 24.5 (4.4)                 | 0.05                       |
| Gestational age at delivery (weeks) | 37.5 (1.5)                | 37.6 (1.3)                 | 0.81                       |
| Birthweight (grams)                 | 2938 (464)                | 2771 (538)                 | 0.34                       |
|                                     | <b>N (%)</b>              |                            | <b>P-value<sup>2</sup></b> |
| Preterm labor (<37 weeks)           | 6 (35%)                   | 3 (18%)                    | 0.44                       |
| Low birthweight (<2500 grams)       | 1 (6%)                    | 6 (35%)                    | 0.09                       |
| Primigravidae                       | 3 (18%)                   | 9 (53%)                    | 0.07                       |
| Multigravidae                       | 14 (82%)                  | 8 (47%)                    | 0.07                       |

<sup>1</sup> For maternal age, gestational age at delivery, and birthweight, the p-values were derived from a T-test of differences in mean values in controls vs. malaria-infected cases.

<sup>2</sup> For preterm labor, low birthweight, and parity categories, the p-values were derived from a Fisher's exact test of differences of proportions in controls versus malaria-infected cases.

**Table S2. Infection parameters and histopathological features (Kinshasa, Democratic Republic of the Congo [-/+ malaria]).**

|                                                          | Control (-malaria)<br>n=17 | Infected (+malaria)<br>n=17 |                |
|----------------------------------------------------------|----------------------------|-----------------------------|----------------|
| <b>Infection Parameters<sup>1</sup></b>                  | <b>Median (Min, Max)</b>   |                             |                |
| iRBCs/400x field (#)                                     | <i>na</i>                  | 100.7 (0.07, 1000+)         |                |
| villi with hemozoin/total villi in a 400x field (%)      | <i>na</i>                  | 9.0 (0, 27.0)               |                |
| <b>Histopathological Features<sup>1</sup></b>            | <b>Median (Min, Max)</b>   |                             | <b>P-value</b> |
| leukocytes/400x field (#)                                | 18.0 (8.6, 30.5)           | 26.3 (14.6, 128.0)          | 0.01           |
| # villi with loss of STB/total villi in a 400x field (%) | 9.0 (3.0, 13.0)            | 17.0 (10.0, 39.0)           | <0.0001        |

<sup>1</sup> Descriptive statistics are based on means for 5 biopsies per placenta and 3 fields per biopsy
